# Supplementary material for: Hydration of the lithospheric mantle above big mantle wedges indicated by sapphire deposits
Source: Research Square preprint supplement (doi:10.21203/rs.3.rs-4794218/v1), 2024-08-02
Supplement: Supplementary file 1 [file a1d755748bf25a44b597264d.xlsx]

## Sheet: Table A1
Table A1. Information of the magmatic sapphire deposits in East China and East Australia
Representative deposits	Coordinates		Age (Ma)			Assocaited subduction zone	Distance from treches (km)	References
	Lat	Long	Sapphire-bearing host rock	Zircon megacryst	Zircon inclusions					Reference:
Eastern Russia
Podgelbanochny	46.02	134.74	11-13	11.1-11.6		Japan Trench	~850
Shkotovo	44.03	132.11				Japan Trench	~1000
Eastern China										Basu, A. R., Wang, J. W., Huang, W. K., Xie, G. H., and Tatsumoto, M., 1991, Major element, REE, and Pb, Nd and Sr isotopic geochemistry of Cenozoic volcanic-rocks of eastern China - implications for their origin from suboceanic-type mantle reservoirs: Earth and Planetary Science Letters, v. 105, no. 1-3, p. 149-169, 10.1016/0012-821x(91)90127-4.
Muling, Heilongjiang Province	44.92	130.52	9-8			Japan Trench	~1200	Liu et al., 2023		Birch, W. D., Barron, L. M., Magee, C., and Sutherland, F. L., 2007, Gold- and diamond-bearing White Hills Gravel, St Arnaud district, Victoria: age and provenance based on U-Pb dating of zircon and rutile: Australian Journal of Earth Sciences, v. 54, no. 4, p. 609-628, 10.1080/08120090701188996.
Kuandian, Liaoning Province	42.58	126.44	0.274			Japan Trench	~1600	Wang et al., 2000; Basu et al., 1991		Coenraads, R. R., 1990, Key areas for alluvial diamond and sapphire exploration in the New England gem fields, New South Wales, Australia: Economic Geology and the Bulletin of the Society of Economic Geologists, v. 85, no. 6, p. 1186-1207, 10.2113/gsecongeo.85.6.1186.
Changle, Shandong Province	36.55	118.89	19.2	19.2		Nankai Trench	~1400	Su et al., 2014; Xu et al., 2012		Johnson, R. W., Knutson, J., and Taylor, S. R., 1989, Intraplate volcanism: in eastern Australia and New Zealand, Cambridge University Press.
Luhe, Jiangsu Province	32.47	118.94	11-9			Nankai Trench	~1300	Li and Liu, 2020		Li, Y. Q., and Liu, J. Z., 2020, Late Cenozoic columnar-jointed basaltic lavas in eastern and southeastern China: morphologies, structures, and formation mechanisms: Bulletin of Volcanology, v. 82, no. 7, 10.1007/s00445-020-01397-1.
Mingxi, Fujian Province	26.42	117.2	1.3-1.1	1.2		Nankai Trench	~1200	Yu et al., 2010		Liu, Y., Lu, R., and Pan, S., 2023, Characterisation and In Situ Age Determination of Zircon Inclusions in Sapphires from Muling, North-East China: Journal of Gemmology, v. 38, no. 6, p. 564-581, 10.15506/JoG.2023.38.6.564.
Penglai, Hainan Province	19.54	110.54	6-3	4.1				Wang et al., 2012		Su, F., Xiao, Y., He, H. Y., Su, B. X., Wang, Y., and Zhu, R. X., 2014, He and Ar isotope geochemistry of pyroxene megacrysts and mantle xenoliths in Cenozoic basalt from the Changle-Linqu area in western Shandong: Chinese Science Bulletin, v. 59, no. 4, p. 396-411, 10.1007/s11434-013-0027-2.
Southeastern Asia
Ban Huai Sai, Laos	20.81	100.54	1-2	2.4-4.3, 3.3-4.1	1.1-1.5	Andaman Trench	~750
Prae, Thailand	18.22	100.12				Andaman Trench	~600
Denchai, Thiland	17.93	100				Andaman Trench	~600
Bo Ploi, Thailand	14.36	99.5				Andaman Trench	~650
Chanthaburi, Thailand	12.6	102.09	0.44-3	1-2		Andaman Trench	~600
Dak Nong, Vietnam	12.23	107.68	1.1-7.1	0.1-0.9, 1.05, 6.5		Andaman Trench	~1600
Eastern Australia										Sutherland, F., Graham, I., Pogson, R., Schwarz, D., Webb, G., Coenraads, R., Fanning, C., Hollis, J., and Allen, T., 2002, The Tumbarumba basaltic gem field, New South Wales: In relation to sapphire-ruby deposits of eastern Australia: RECORDS-AUSTRALIAN MUSEUM, v. 54, no. 2, p. 215-248,
Lava Plains, Queensland	-18.55	144.8	5-2			Tonga Trench	~4000	Sutherland et al., 2015; Zhang et al., 2001		Sutherland, F. L., and Fanning, C. M., 2001, Gem-bearing basaltic volcanism, Barrington, New South Wales: Cenozoic evolution, based on basalt K-Ar ages and zircon fission track and U-Pb isotope dating: Australian Journal of Earth Sciences, v. 48, no. 2, p. 221-237, 10.1046/j.1440-0952.2001.00851.x.
Anakie fields, Queensland	-23.43	147.68	31-19			Tonga Trench	~3700	Zhang et al., 2001		Sutherland, F. L., Sutherland, F. L., Coenraads, R. R., Robert, R. C., Ahmadjan, A., Sebastien, M., Paul, W. H., Paul, W. H., Paul, W. O. H., Gaston, G., Roy, B., Richard, W., Sutherland, G. B., and Sutherland, G. B., 2015, Corundum (sapphire) and zircon relationships, Lava Plains gem fields, NE Australia: Integrated mineralogy, geochemistry, age determination, genesis and geographical typing: Mi…
Glen Innes, New South Wales	-29.21	151.03	38-32, 23-19			Kermadec Trench	~3000	Coenraads, 1990		Wang, D. H., Chen, Y. C., Xu, J., Yang, J. M., Xue, C. J., and Yan, S. H., 2000, Cenozoic mineralization in China, as a key to past mineralization and a clue to future prospecting: Acta Geologica Sinica-English Edition, v. 74, no. 3, p. 478-484,
Barrington Tops, New South Wales	-31.84	151.74	57, 43, 38, 28, 4-5	4-5, 28-38,45-46, 50-60		Kermadec Trench	~2900	Sutherland and Fanning, 2001		Wang, X. C., Li, Z. X., Li, X. H., Li, J., Liu, Y., Long, W. G., Zhou, J. B., and Wang, F., 2012, Temperature, Pressure, and Composition of the Mantle Source Region of Late Cenozoic Basalts in Hainan Island, SE Asia: a Consequence of a Young Thermal Mantle Plume close to Subduction Zones?: Journal of Petrology, v. 53, no. 1, p. 177-233, 10.1093/petrology/egr061.
St Arnaud district, Victoria	-35.89	145.51	74.5-67.4			Kermadec Trench	~3400	Birch et al., 2007		Wong, J., Verdel, C., and Allen, C. M., 2017, Trace-element compositions of sapphire and ruby from the eastern Australian gemstone belt: Mineralogical Magazine, v. 81, no. 6, p. 1551-1576, 10.1180/minmag.2017.081.012.
Toom bullup district, Victoria	-35.76	141.79	45.9-31			Kermadec Trench	~2800	Wong et al., 2017; Johnson et al., 1989		Xu, Z., Zhao, Z. F., and Zheng, Y. F., 2012, Slab-mantle interaction for thinning of cratonic lithospheric mantle in North China: Geochemical evidence from Cenozoic continental basalts in central Shandong: Lithos, v. 146, p. 202-217, 10.1016/j.lithos.2012.05.019.
Tumbarumba, New South Wales	-35.9189	148.085	27-15	16-27	23-28, 400	Kermadec Trench	~2800	Sutherland et al., 2002		Yu, Y., Xu, X. S., and Chen, X. M., 2010, Genesis of zircon megacrysts in Cenozoic alkali basalts and the heterogeneity of subcontinental lithospheric mantle, eastern China: Mineralogy and Petrology, v. 100, no. 1-2, p. 75-94, 10.1007/s00710-010-0120-z.
Weldborough, Tasmania	-41.1329	147.876	47.4-46.2	46-47, 249	47			Zaw et al., 2006; Sutherland and Wellman, 1986		Zaw, K., Sutherland, F. L., Dellapasqua, F., Ryan, C. G., Yui, T. F., Mernagh, T. P., and Duncan, D., 2006, Contrasts in gem corundum characteristics, eastern Australian basaltic fields: trace elements, fluid/melt inclusions and oxygen isotopes: Mineralogical Magazine, v. 70, no. 6, p. 669-687, 10.1180/0026461067060356.

## Sheet: TABLE A2
Table A2. Melting depth of alkaline basalts
Locality	Lat	Long (°E)	Sample	CalP(GPa)	CalT(°C)	Equilibirum depth(km)	Correlation CalP(GPa)	Correlation CalT(°C)	Age(Ma)	References
East China												Reference:
Hebi	35.83	114.15	FS_01	2.52482	1346.36	83.3192	2.52482	1346.36	6.4	Su et al., 2023		Basu, A.R., Wang, J., Huang, W., Xie, G., Tatsumoto, M., 1991. Major element, REE, and Pb, Nd and Sr isotopic geochemistry of Cenozoic volcanic rocks of eastern China: implications for their origin from suboceanic-type mantle reservoirs. Earth and Planetary Science Letters 105, 149-169.
Hebi	35.83	114.15	FS_03	2.56031	1357.06	84.4904	2.56031	1357.06	6.4	Su et al., 2023		Cong, B.L., Zhang, R.Y., 1982. Petrogenesis of the Hannuoba basalts and ultramafic xenoliths. Science China (Series D), (in Chinese).
Hebi	35.83	114.15	FS_05	2.74225	1392.71	90.4944	2.74225	1392.71	6.4	Su et al., 2023		E. M. -L., Zhao, D. S., Cenozoic Basalts and Deep-seated Xenoliths in Eastern China (in Chinese with English abstract), Beijing: Science Press, 1987, 490.
Hebi	35.83	114.15	HS_01	2.5149	1335.45	82.9915	2.5149	1335.45	6.4	Su et al., 2023		Fan, Q. C., Sun, Q., Li, N. & Sui, J. L. (2004). Periods of volcanic activity and magma evolution of Holocene in North Hainan Island. Acta Petrologica Sinica 20, 533^544 (in Chinese with English abstract).
Hebi	35.83	114.15	HS_03	2.49865	1326.75	82.4555	2.49865	1326.75	6.4	Su et al., 2023		Fan, Q., Hooper, P.R., 1991. The Cenozoic Basaltic Rocks of Eastern China: Petrology and Chemical Composition. Journal of Petrology 32, 765-810.
Hebi	35.83	114.15	HS_04	2.60221	1366.61	85.8728	2.60221	1366.61	6.4	Su et al., 2023		Fan, Q.C., Chen, W.J., Hurford, A.J., Hunziker, J.C., 1992. The major and trace element chemistry of Quaterary basalt in Datong. In: Liu, R.X. (Ed.), The age and geochemistry of Cenozoic volcanics in China. Seismologic press, pp. 149-170 (in Chinese).
Hebi	35.83	114.15	HS_05	2.49219	1361.26	82.2421	2.49219	1361.26	6.4	Su et al., 2023		Li, S., Liu, D., Zhang, Z., Xu, J., 1988. REE compositional characteristics of Hannuoba basalts. Chinese Journal of Geochemistry 7, 243-251.
Hebi	35.83	114.15	SY_01	2.43135	1359.11	80.2346	2.43135	1359.11	6.4	Su et al., 2023		Liu, C.-Q., Masuda, A., Xie, G., 1994. Major- and trace-element compositions of Cenozoic basalts in eastern China: Petrogenesis and mantle source. Chemical Geology 114, 19-42.
Hebi	35.83	114.15	SY_02	2.6092	1385.07	86.1036	2.6092	1385.07	6.4	Su et al., 2023		Ma, J.L., Xu, Y.-G., 2004. Petrology and geochemistry of the Cenozoic basalts from Yangyuan of Hebei Province and Datong of Shanxi Province:Implications for the deep process in the western North China Craton. Geochimica.
Hebi	35.83	114.15	SY_03	2.51041	1375.22	82.8437	2.51041	1375.22	6.4	Su et al., 2023		Su X, Ping J, Leng W, et al. Magma system and equilibrium depth of the Cenozoic basalts in the central North China craton[J]. Lithos, 2023, 446: 107142.
Hebi	35.83	114.15	SY_06	2.75404	1416.13	90.8834	2.75404	1416.13	6.4	Su et al., 2023		Sun P, Niu Y, Guo P, et al. The evolution and ascent paths of mantle xenolith-bearing magma: Observations and insights from Cenozoic basalts in Southeast China. Lithos, 2018, 310: 171-181.
Hebi	35.83	114.15	FS_1	2.14093	1310.24	87.1507	2.64093	1310.24	6.4	Zhu et al., 2012		Tang, Y.-J., Zhang, H.-F., Ying, J.-F., 2006. Asthenosphere–lithospheric mantle interaction in an extensional regime: Implication from the geochemistry of Cenozoic basalts from Taihang Mountains, North China Craton. Chemical Geology 233, 309-327.
Hebi	35.83	114.15	FS_2	2.26327	1339.34	91.1878	2.76327	1339.34	6.4	Zhu et al., 2012		Wang X C, Li Z X, Li X H, et al. Temperature, pressure, and composition of the mantle source region of Late Cenozoic basalts in Hainan Island, SE Asia: a consequence of a young thermal mantle plume close to subduction zones?[J]. Journal of Petrology, 2012, 53(1): 177-233.
Hebi	35.83	114.15	FS_3	2.22018	1326	89.7658	2.72018	1326	6.4	Zhu et al., 2012		Wang, W., 1979. Report of regional geological survey with scale of 1:200000 in Hebi area. Geological Bureau of Henan Province.
Hebi	35.83	114.15	FS_5	2.19413	1321.33	88.9063	2.69413	1321.33	6.4	Zhu et al., 2012		Xie, G.H., and Wang, J.W., 1992. The geochemistry of Hannuoba basalts and their ultra-mafic xenoliths. In: Liu, R.X. (Ed.), The age and geochemistry of Cenozoic volcanics in China. Seismologic press, pp. 149-170 (in Chinese).
Hebi	35.83	114.15	10JH001	2.06708	1290.72	84.7135	2.56708	1290.72	6.4	Zhu et al., 2012		Xu, R., Liu, Y., Wang, X., Zong, K., Hu, Z., Chen, H., Zhou, L., 2017. Crust recycling induced compositional-temporal-spatial variations of Cenozoic basalts in the Trans-North China Orogen. Lithos 274-275, 383-396.
Hebi	35.83	114.15	10JH002	2.10173	1298.63	85.8571	2.60173	1298.63	6.4	Zhu et al., 2012		Xu, Y.-G., Chung, S.-L., Ma, J., Shi, L., 2004. Contrasting Cenozoic Lithospheric Evolution and Architecture in the Western and Eastern Sino-Korean Craton: Constraints from Geochemistry of Basalts and Mantle Xenoliths. Journal of Geology 112, 593-605.
Hebi	35.83	114.15	10JH003	1.9132	1268.88	79.6355	2.4132	1268.88	6.4	Zhu et al., 2012		Zhi, X., Song, Y., Frey, F.A., Feng, J., Zhai, M., 1990. Geochemistry of Hannuoba basalts, eastern China: Constraints on the origin of continental alkalic and tholeiitic basalt. Chemical Geology 88, 1-33.
Hebi	35.83	114.15	10JH004	2.13397	1292.25	86.9209	2.63397	1292.25	6.4	Zhu et al., 2012		Zhou, X., Armstrong, R.L., 1982. Cenozoic volcanic rocks of eastern China secular and geographic trends in chemistry and strontium isotopic composition. Earth and Planetary Science Letters 58, 301-329.
Hebi	35.83	114.15	10JH005	1.88268	1288.3	78.6284	2.38268	1288.3	6.4	Zhu et al., 2012		Zhu, Y.-S., Hou, G., Yang, J.-H., 2012. Sources and petrogenesis of the Cenozoic alkali basalts in Hebi, eastern North Chian craton: Geochemical and Sr-Nd-Hf isotopic evidence. Acta Petrologica Sinica 28, 4064-4076 (in Chinese with English abstract).
Hebi	35.83	114.15	10JH006	1.87821	1287.69	78.481	2.37821	1287.69	6.4	Zhu et al., 2012		Zou, H. & Fan, Q. (2010). U-Th isotopes in Hainan basalts: Implications for sub-asthenospheric origin of EM2 mantle endmember and the dynamics of melting beneath Hainan Island. Lithos 116, 145^152.
Hebi	35.83	114.15	10JH007	1.92368	1297.2	79.9816	2.42368	1297.2	6.4	Zhu et al., 2012
Hebi	35.83	114.15	10JH008	1.89388	1287.05	78.9979	2.39388	1287.05	6.4	Zhu et al., 2012
Hebi	35.83	114.15	1	1.93372	1308.63	80.3128	2.43372	1308.63	6.4	Wang, 1979
Hebi	35.83	114.15	2	2.25868	1376.39	91.0363	2.75868	1376.39	6.4	Wang, 1979
Hebi	35.83	114.15	3	2.18786	1301.15	88.6994	2.68786	1301.15	6.4	Wang, 1979
Hebi	35.83	114.15	4	1.9398	1264.36	80.5135	2.4398	1264.36	6.4	Wang, 1979
Hebi	35.83	114.15	5	2.02353	1314.15	83.2765	2.52353	1314.15	6.4	Wang, 1979
Hebi	35.83	114.15	6	2.58203	1388.06	101.707	3.08203	1388.06	6.4	Wang, 1979
Hebi	35.83	114.15	7	2.2004	1265.25	89.1131	2.7004	1265.25	6.4	Wang, 1979
Hebi	35.83	114.15	8	2.73662	1382.13	106.808	3.23662	1382.13	6.4	Wang, 1979
Hebi	35.83	114.15	HH-2	2.38829	1333.58	95.3134	2.88829	1333.58	6.4	Zhou and Armstrong, 1982
Datong	40.05	113.02	DT-22	2.3646	1282.56	94.5316	2.8646	1282.56	1	Xu et al., 2004
Datong	40.05	113.02	SD-3	2.32924	1326.26	93.365	2.82924	1326.26	1	Fan and Hooper, 1991
Datong	40.05	113.02	BDT-1	2.30636	1310.66	92.6099	2.80636	1310.66	3	Basu et al., 1991
Datong	40.05	113.02	BDT1-1	2.28969	1301.81	92.0596	2.78969	1301.81	0.3	Basu et al., 1991
Datong	40.05	113.02	BB1	2.24948	1308.44	90.7328	2.74948	1308.44	1	Fan et al., 1992
Datong	40.05	113.02	BB4	2.30277	1311.1	92.4913	2.80277	1311.1	1	Fan et al., 1992
Datong	40.05	113.02	BB5	2.21425	1287.39	89.5702	2.71425	1287.39	1	Fan et al., 1992
Datong	40.05	113.02	BB6	2.24685	1296.62	90.6461	2.74685	1296.62	1	Fan et al., 1992
Datong	40.05	113.02	BB6'	2.24094	1293.07	90.4511	2.74094	1293.07	1	Fan et al., 1992
Datong	40.05	113.02	BB15	2.26097	1309.5	91.1121	2.76097	1309.5	1	Fan et al., 1992
Datong	40.05	113.02	BB19	2.32533	1304.75	93.236	2.82533	1304.75	1	Fan et al., 1992
Datong	40.05	113.02	SD113	2.24784	1304.33	90.6786	2.74784	1304.33	1	Fan et al., 1992
Datong	40.05	113.02	BB13	2.23273	1293.95	90.18	2.73273	1293.95	1	Fan et al., 1992
Datong	40.05	113.02	SD115	2.17377	1310.3	88.2343	2.67377	1310.3	1	Fan et al., 1992
Datong	40.05	113.02	BB7	2.23765	1336.12	90.3426	2.73765	1336.12	1	Fan et al., 1992
Datong	40.05	113.02	BB8	2.20633	1278.17	89.3089	2.70633	1278.17	1	Fan et al., 1992
Datong	40.05	113.02	BB11	2.04597	1320.34	84.0171	2.54597	1320.34	1	Fan et al., 1992
Datong	40.05	113.02	SD-3h	2.32859	1326.27	93.3435	2.82859	1326.27	1	Fan et al., 1992
Datong	40.05	113.02	SD5	2.51361	1351.97	99.4493	3.01361	1351.97	1	Fan et al., 1992
Datong	40.05	113.02	SD6	2.5181	1365.33	99.5972	3.0181	1365.33	1	Fan et al., 1992
Datong	40.05	113.02	SD7	2.45035	1335.35	97.3617	2.95035	1335.35	1	Fan et al., 1992
Datong	40.05	113.02	SD14	2.32305	1319.48	93.1606	2.82305	1319.48	1	Fan et al., 1992
Datong	40.05	113.02	SD16	2.3387	1329.01	93.677	2.8387	1329.01	1	Fan et al., 1992
Datong	40.05	113.02	SD17	2.30538	1325.55	92.5776	2.80538	1325.55	1	Fan et al., 1992
Datong	40.05	113.02	SD18	2.38666	1335.26	95.2599	2.88666	1335.26	1	Fan et al., 1992
Datong	40.05	113.02	SD104	2.23963	1311.39	90.4077	2.73963	1311.39	1	Fan et al., 1992
Datong	40.05	113.02	SD115a	2.37759	1322.78	94.9604	2.87759	1322.78	1	Fan et al., 1992
Datong	40.05	113.02	DT-1	2.61681	1312.29	102.855	3.11681	1312.29	1	Ma and Xu, 2004
Datong	40.05	113.02	DT-14	2.34098	1272.34	93.7522	2.84098	1272.34	1	Ma and Xu, 2004
Datong	40.05	113.02	DT-17	2.39902	1279.04	95.6678	2.89902	1279.04	1	Ma and Xu, 2004
Datong	40.05	113.02	DT-18	2.40161	1280.63	95.7532	2.90161	1280.63	1	Ma and Xu, 2004
Datong	40.05	113.02	DT-20	2.35713	1281.5	94.2852	2.85713	1281.5	1	Ma and Xu, 2004
Datong	40.05	113.02	DT-23	2.432	1279.95	96.7559	2.932	1279.95	1	Ma and Xu, 2004
Datong	40.05	113.02	DT-24	2.3413	1283.55	93.7629	2.8413	1283.55	1	Ma and Xu, 2004
Datong	40.05	113.02	09DT003	2.50497	1311.85	99.1639	3.00497	1311.85	1	Xu et al., 2017
Datong	40.05	113.02	09DT004	2.52962	1316.95	99.9775	3.02962	1316.95	1	Xu et al., 2017
Datong	40.05	113.02	09DT013	2.23996	1275.03	90.4186	2.73996	1275.03	1	Xu et al., 2017
Datong	40.05	113.02	09DT016	2.22708	1276.2	89.9937	2.72708	1276.2	1	Xu et al., 2017
Datong	40.05	113.02	09DT017	2.24981	1283.98	90.7436	2.74981	1283.98	1	Xu et al., 2017
Datong	40.05	113.02	09DT018	2.24258	1272.71	90.5053	2.74258	1272.71	1	Xu et al., 2017
Datong	40.05	113.02	09DT019	2.20336	1268.53	89.211	2.70336	1268.53	1	Xu et al., 2017
Datong	40.05	113.02	09DT020	2.24784	1277.73	90.6786	2.74784	1277.73	1	Xu et al., 2017
Datong	40.05	113.02	09DT021	2.25999	1272.61	91.0795	2.75999	1272.61	1	Xu et al., 2017
Fanshi	39.26	112.58	SF-2	2.12633	1361.97	86.669	2.62633	1361.97	25.2308	Fan et al., 1991
Fanshi	39.26	112.58	SF-1-1	1.90643	1277.67	79.412	2.40643	1277.67	25.2308	Zhou and Armstrong, 1982
Fanshi	39.26	112.58	FS03-1	1.9071	1327.16	79.4344	2.4071	1327.16	24.4	Tang et al., 2006
Fanshi	39.26	112.58	FS03-10	1.8837	1331.86	78.662	2.3837	1331.86	25.8	Tang et al., 2006
Fanshi	39.26	112.58	FS03-3	1.93642	1275.17	80.402	2.43642	1275.17	24.7	Tang et al., 2006
Fanshi	39.26	112.58	FS03-30	2.0614	1367.82	84.5261	2.5614	1367.82	25.6	Tang et al., 2006
Fanshi	39.26	112.58	FS03-32	1.955	1326.23	81.015	2.455	1326.23	26.3	Tang et al., 2006
Fanshi	39.26	112.58	FS03-33	1.89116	1324.02	78.9083	2.39116	1324.02	25.6	Tang et al., 2006
Fanshi	39.26	112.58	FS03-36	2.05806	1322.05	84.4159	2.55806	1322.05	24.7	Tang et al., 2006
Fanshi	39.26	112.58	FS03-38	2.07876	1329.93	85.0992	2.57876	1329.93	25	Tang et al., 2006
Fanshi	39.26	112.58	FS03-8	1.9176	1316.52	79.7807	2.4176	1316.52	25.6	Tang et al., 2006
Fanshi	39.26	112.58	FS03-9	1.89964	1326.62	79.188	2.39964	1326.62	24.7	Tang et al., 2006
Fanshi	39.26	112.58	HHL03-1	1.82283	1299.02	76.6533	2.32283	1299.02	25.7	Tang et al., 2006
Fanshi	39.26	112.58	HHL03-2	1.83374	1301	77.0135	2.33374	1301	25.6	Tang et al., 2006
Fanshi	39.26	112.58	FS03-2	2.24587	1323.31	90.6136	2.74587	1323.31	24.3	Tang et al., 2006
Fanshi	39.26	112.58	HH-2'	2.07642	1329.84	85.0217	2.57642	1329.84	25.2308	Fan and Hooper, 1991
Fanshi	39.26	112.58	09FS002	2.00822	1330.55	82.7711	2.50822	1330.55	25.2308	Xu et al., 2017
Fanshi	39.26	112.58	09FS003	2.27135	1349.96	91.4545	2.77135	1349.96	25.2308	Xu et al., 2017
Fanshi	39.26	112.58	09FS008	2.2126	1342.63	89.5158	2.7126	1342.63	25.2308	Xu et al., 2017
Fanshi	39.26	112.58	09FS010	1.99075	1309.86	82.1948	2.49075	1309.86	25.2308	Xu et al., 2017
Fanshi	39.26	112.58	09FS011	2.02085	1310.01	83.188	2.52085	1310.01	25.2308	Xu et al., 2017
Fanshi	39.26	112.58	09FS014	2.04095	1329.51	83.8515	2.54095	1329.51	25.2308	Xu et al., 2017
Hannuoba	41.1	114.79	T-01	2.10539	1350.55	85.9778	2.60539	1350.55	4.38	Zhou and Armstrong, 1982
Hannuoba	41.1	114.79	HC-32	1.87482	1302.02	78.3689	2.37482	1302.02	21	Zhou and Armstrong, 1982
Hannuoba	41.1	114.79	R-2	2.02588	1314.47	83.3539	2.52588	1314.47	18.3	Zhi et al., 1990
Hannuoba	41.1	114.79	R-4	2.18335	1363.69	88.5505	2.68335	1363.69	18.3	Zhi et al., 1990
Hannuoba	41.1	114.79	R-6	2.09242	1343.38	85.55	2.59242	1343.38	18.3	Zhi et al., 1990
Hannuoba	41.1	114.79	R-8	2.0052	1311.47	82.6715	2.5052	1311.47	18.3	Zhi et al., 1990
Hannuoba	41.1	114.79	R-9	1.78756	1260.68	75.4894	2.28756	1260.68	18.3	Zhi et al., 1990
Hannuoba	41.1	114.79	R-11	1.79548	1267.54	75.751	2.29548	1267.54	18.3	Zhi et al., 1990
Hannuoba	41.1	114.79	R-19	1.74876	1278.75	74.2091	2.24876	1278.75	18.3	Zhi et al., 1990
Hannuoba	41.1	114.79	ZB-111	2.12567	1299.46	86.6471	2.62567	1299.46	21	Zhi et al., 1990
Hannuoba	41.1	114.79	ZB-41	1.93102	1236.52	80.2236	2.43102	1236.52	21	Zhi et al., 1990
Hannuoba	41.1	114.79	ZB-49	2.11037	1256.35	86.1424	2.61037	1256.35	21	Zhi et al., 1990
Hannuoba	41.1	114.79	ZB-53	1.9088	1299.94	79.4903	2.4088	1299.94	21	Zhi et al., 1990
Hannuoba	41.1	114.79	ZB-83	1.93271	1267.29	80.2794	2.43271	1267.29	21	Zhi et al., 1990
Hannuoba	41.1	114.79	ZB-77	1.87787	1248.53	78.4698	2.37787	1248.53	21	Zhi et al., 1990
Hannuoba	41.1	114.79	D-1	2.42554	1405.3	96.5428	2.92554	1405.3	21	Zhi et al., 1990
Hannuoba	41.1	114.79	D-3	2.20567	1339.17	89.2872	2.70567	1339.17	21	Zhi et al., 1990
Hannuoba	41.1	114.79	D-5	2.0175	1264.54	83.0773	2.5175	1264.54	21	Zhi et al., 1990
Hannuoba	41.1	114.79	Bai-1	2.18819	1326.92	88.7103	2.68819	1326.92	21	Zhi et al., 1990
Hannuoba	41.1	114.79	Bai-2	2.12234	1317.58	86.5371	2.62234	1317.58	21	Zhi et al., 1990
Hannuoba	41.1	114.79	Bai-3	1.95466	1287.92	81.0038	2.45466	1287.92	21	Zhi et al., 1990
Hannuoba	41.1	114.79	Bai-9	2.20238	1351.01	89.1784	2.70238	1351.01	21	Zhi et al., 1990
Hannuoba	41.1	114.79	Bai-10	2.1784	1324.11	88.387	2.6784	1324.11	21	Zhi et al., 1990
Hannuoba	41.1	114.79	Bai-20	2.20106	1331.4	89.1349	2.70106	1331.4	21	Zhi et al., 1990
Hannuoba	41.1	114.79	Bai-22	2.06507	1277.59	84.6473	2.56507	1277.59	21	Zhi et al., 1990
Hannuoba	41.1	114.79	Bai-23	1.98469	1244.98	81.9947	2.48469	1244.98	21	Zhi et al., 1990
Hannuoba	41.1	114.79	Bai-15	2.06073	1282.02	84.5041	2.56073	1282.02	21	Zhi et al., 1990
Hannuoba	41.1	114.79	Bai-21	2.1938	1334.35	88.8954	2.6938	1334.35	21	Zhi et al., 1990
Hannuoba	41.1	114.79	Bai-24	1.96107	1229.13	81.2153	2.46107	1229.13	21	Zhi et al., 1990
Hannuoba	41.1	114.79	ZX-36	2.08643	1316.36	85.3521	2.58643	1316.36	21	Zhi et al., 1990
Hannuoba	41.1	114.79	ZX-44	2.27987	1372.87	91.7357	2.77987	1372.87	21	Zhi et al., 1990
Hannuoba	41.1	114.79	ZX-62	1.99512	1243.49	82.339	2.49512	1243.49	21	Zhi et al., 1990
Hannuoba	41.1	114.79	ZX-72	1.92368	1251.58	79.9816	2.42368	1251.58	21	Zhi et al., 1990
Hannuoba	41.1	114.79	Z-2	2.19644	1326.73	88.9825	2.69644	1326.73	21	Zhi et al., 1990
Hannuoba	41.1	114.79	J-14	2.0052	1316.59	82.6715	2.5052	1316.59	21	Zhi et al., 1990
Hannuoba	41.1	114.79	DF-2	2.12932	1325.98	86.7676	2.62932	1325.98	15	Basu et al., 1991
Hannuoba	41.1	114.79	D-11	2.21985	1355.28	89.7549	2.71985	1355.28	15	Basu et al., 1991
Hannuoba	41.1	114.79	D-15	1.94419	1352.78	80.6583	2.44419	1352.78	20.5	Xie and Wang, 1992
Hannuoba	41.1	114.79	D-14	2.38634	1420.37	95.2492	2.88634	1420.37	20.5	Xie and Wang, 1992
Hannuoba	41.1	114.79	D-12	1.85032	1286.81	77.5606	2.35032	1286.81	20.5	Xie and Wang, 1992
Hannuoba	41.1	114.79	D-6	1.91286	1224.55	79.6243	2.41286	1224.55	20.5	Xie and Wang, 1992
Hannuoba	41.1	114.79	D-4	2.35566	1351.61	94.2369	2.85566	1351.61	20.5	Xie and Wang, 1992
Hannuoba	41.1	114.79	D-60	2.4481	1342.18	97.2873	2.9481	1342.18	18.7	Xie and Wang, 1992
Hannuoba	41.1	114.79	HB4	2.55235	1302.51	100.727	3.05235	1302.51	15	Liu et al., 1994
Hannuoba	41.1	114.79	HB5	2.0781	1312.51	85.0772	2.5781	1312.51	15	Liu et al., 1994
Hannuoba	41.1	114.79	HJ-2	2.42393	1386.16	96.4896	2.92393	1386.16	18.3	Fan and Hooper, 1991
Hannuoba	41.1	114.79	83-4	2.13563	1361.75	86.9757	2.63563	1361.75	17.8	Li et al., 1988
Hannuoba	41.1	114.79	83-7	2.04329	1316.72	83.9287	2.54329	1316.72	17.8	Li et al., 1988
Hannuoba	41.1	114.79	83-8	2.18236	1253.92	88.5178	2.68236	1253.92	17.8	Li et al., 1988
Hannuoba	41.1	114.79	83-12	2.17773	1356.07	88.3652	2.67773	1356.07	17.8	Li et al., 1988
Hannuoba	41.1	114.79	83-14	2.1774	1358.26	88.3544	2.6774	1358.26	17.8	Li et al., 1988
Hannuoba	41.1	114.79	HW-1	2.3633	1408.48	94.4888	2.8633	1408.48	18.3	Cong and Zhang, 1982
Hannuoba	41.1	114.79	HW1-1	2.41778	1382.74	96.2866	2.91778	1382.74	18.3	Cong and Zhang, 1982
Hannuoba	41.1	114.79	HW-2	1.92402	1239.76	79.9928	2.42402	1239.76	18.3	Cong and Zhang, 1982
Hannuoba	41.1	114.79	HW-4	1.82692	1247.85	76.7885	2.32692	1247.85	18.3	Cong and Zhang, 1982
Hannuoba	41.15	114.69	ZB-11	2.06641	1302.34	84.6915	2.56641	1302.34	22.8	Xu et al., 2017
Hannuoba	41.15	114.69	ZB-02*	2.14259	1323.35	87.2054	2.64259	1323.35	22.8	Xu et al., 2017
Hannuoba	41.15	114.69	Zh-1	2.05973	1338.46	84.471	2.55973	1338.46	22.8	Zhi et al., 1990
Hannuoba	41.15	114.69	Zh-3	2.05973	1332.88	84.471	2.55973	1332.88	22.8	Zhi et al., 1990
Hannuoba	41.15	114.69	Zh-6	1.95466	1277.55	81.0038	2.45466	1277.55	22.8	Zhi et al., 1990
Hannuoba	41.15	114.69	Zh-7	1.97089	1280.39	81.5394	2.47089	1280.39	22.8	Zhi et al., 1990
Hannuoba	41.15	114.69	Zh-12	2.0453	1275.1	83.995	2.5453	1275.1	22.8	Zhi et al., 1990
Hannuoba	41.15	114.69	Zh-14-1	2.06874	1278.3	84.7685	2.56874	1278.3	22.8	Zhi et al., 1990
Hannuoba	41.15	114.69	Zh-14-2	1.7948	1248.48	75.7284	2.2948	1248.48	22.8	Zhi et al., 1990
Hannuoba	41.15	114.69	Zh-20	2.22643	1262.94	89.972	2.72643	1262.94	22.8	Zhi et al., 1990
Hannuoba	41.15	114.69	Zh-21	2.06774	1242.36	84.7355	2.56774	1242.36	22.8	Zhi et al., 1990
Hannuoba	41.1	114.79	XH-36	1.89455	1267.58	79.0203	2.39455	1267.58	30	Zhou and Armstrong, 1982
Hannuoba	41.1	114.79	YY-1	2.18038	1263.31	88.4524	2.68038	1263.31	30	Ma and Xu, 2004
Hannuoba	41.1	114.79	YY-2	2.12234	1258.69	86.5371	2.62234	1258.69	30	Ma and Xu, 2004
Hannuoba	41.1	114.79	YY-3	1.97762	1279.92	81.7615	2.47762	1279.92	30	Ma and Xu, 2004
Hannuoba	41.1	114.79	YY-4	1.89116	1279.14	78.9083	2.39116	1279.14	30	Ma and Xu, 2004
Hannuoba	41.1	114.79	YY-5	2.21063	1259.29	89.4506	2.71063	1259.29	30	Ma and Xu, 2004
Hannuoba	41.1	114.79	YY-6	1.9719	1256.14	81.5727	2.4719	1256.14	30	Ma and Xu, 2004
Hannuoba	41.1	114.79	YY-7	1.85917	1278.97	77.8525	2.35917	1278.97	30	Ma and Xu, 2004
Hannuoba	41.1	114.79	181	1.89455	1267.58	79.0203	2.39455	1267.58	30	Ma and Xu, 2004
Hannuoba	41.1	114.79	09YY01	2.10505	1289.11	85.9668	2.60505	1289.11	30	Xu et al., 2017
Hannuoba	41.1	114.79	09YY02	2.1443	1288.1	87.2619	2.6443	1288.1	30	Xu et al., 2017
Hannuoba	41.1	114.79	09YY03	2.14027	1289.96	87.1289	2.64027	1289.96	30	Xu et al., 2017
Hannuoba	41.1	114.79	09YY04	2.23996	1310.08	90.4186	2.73996	1310.08	30	Xu et al., 2017
Xiyang-Pingding	37.68	113.03	21	1.84385	1235.65	77.3471	2.34385	1235.65	7.6	Molan and Zhao, 1987
Xiyang-Pingding	37.68	113.03	23	2.0242	1253.79	83.2986	2.5242	1253.79	7.6	Molan and Zhao, 1987
Xiyang-Pingding	37.68	113.03	26	1.75014	1225.12	74.2545	2.25014	1225.12	7.6	Molan and Zhao, 1987
Xiyang-Pingding	37.68	113.03	27	2.07475	1276.51	84.9667	2.57475	1276.51	7.6	Molan and Zhao, 1987
Xiyang-Pingding	37.68	113.03	FHS03-1	2.28772	1293	91.9949	2.78772	1293	7.6	Tang et al., 2006
Xiyang-Pingding	37.68	113.03	GB03-2	2.00721	1256.09	82.7379	2.50721	1256.09	7.6	Tang et al., 2006
Xiyang-Pingding	37.68	113.03	JD03-1	2.03928	1248.85	83.7963	2.53928	1248.85	7.6	Tang et al., 2006
Xiyang-Pingding	37.68	113.03	JX03-1	2.03627	1258.52	83.6969	2.53627	1258.52	7.6	Tang et al., 2006
Xiyang-Pingding	37.68	113.03	JX03-3	1.99142	1265.78	82.217	2.49142	1265.78	7.6	Tang et al., 2006
Xiyang-Pingding	37.68	113.03	MAS03-1	2.01682	1250.23	83.0552	2.51682	1250.23	7.6	Tang et al., 2006
Xiyang-Pingding	37.68	113.03	08B043	2.19347	1328.78	88.8845	2.69347	1328.78	7.6	Xu et al., 2017
Xiyang-Pingding	37.68	113.03	08B045	2.15357	1332.3	87.5679	2.65357	1332.3	7.6	Xu et al., 2017
Xiyang-Pingding	37.68	113.03	08B046	2.58346	1314.83	101.754	3.08346	1314.83	7.6	Xu et al., 2017
Xiyang-Pingding	37.68	113.03	08B050	2.36947	1302.36	94.6924	2.86947	1302.36	7.6	Xu et al., 2017
Xiyang-Pingding	37.68	113.03	08B051	2.07776	1253.2	85.0662	2.57776	1253.2	7.6	Xu et al., 2017
Xiyang-Pingding	37.68	113.03	08B052	2.38569	1298.46	95.2278	2.88569	1298.46	7.6	Xu et al., 2017
Xiyang-Pingding	37.68	113.03	08B055	2.17344	1312.51	88.2234	2.67344	1312.51	7.6	Xu et al., 2017
Xiyang-Pingding	37.68	113.03	08B059	1.80471	1248.04	76.0556	2.30471	1248.04	7.6	Xu et al., 2017
Zuoquan	37.05	112.7	ZQ03-1	2.20964	1277.22	89.418	2.70964	1277.22	5.6	Tang et al., 2006
Zuoquan	37.05	112.7	ZQ03-2	2.19875	1274.56	89.0587	2.69875	1274.56	5.6	Tang et al., 2006
Zuoquan	37.05	112.7	ZQ03-4	2.15821	1258.68	87.721	2.65821	1258.68	5.6	Tang et al., 2006
Zuoquan	37.05	112.7	08B028	2.1938	1262.98	88.8954	2.6938	1262.98	5.6	Xu et al., 2017
Zuoquan	37.05	112.7	08B029	2.2462	1263.18	90.6245	2.7462	1263.18	5.6	Xu et al., 2017
Zuoquan	37.05	112.7	08B030	2.10904	1264.94	86.0985	2.60904	1264.94	5.6	Xu et al., 2017
Zuoquan	37.05	112.7	08B032	2.25474	1256.04	90.9064	2.75474	1256.04	5.6	Xu et al., 2017
Zuoquan	37.05	112.7	08B033	2.15821	1264.33	87.721	2.65821	1264.33	5.6	Xu et al., 2017
Zuoquan	37.05	112.7	08B034	2.06607	1268.59	84.6805	2.56607	1268.59	5.6	Xu et al., 2017
Zuoquan	37.05	112.7	08B035	2.1127	1247.77	86.2192	2.6127	1247.77	5.6	Xu et al., 2017
Zuoquan	37.05	112.7	08B037	2.12301	1244.08	86.5595	2.62301	1244.08	5.6	Xu et al., 2017
Zuoquan	37.05	112.7	08B040	2.00788	1282.18	82.7601	2.50788	1282.18	5.6	Xu et al., 2017
Dangyangke	26.42	117.12	PY-DY-01	2.4	1326	95.7	2.9	1326		Sun et al., 2018
Dangyangke	26.42	117.12	PY-DY-02	2.3	1353	92.4	2.8	1353		Sun et al., 2018
Dangyangke	26.42	117.12	PY-DY-09	2.4	1336	95.7	2.9	1336		Sun et al., 2018
Dangyangke	26.42	117.12	DY11-14B	2.3	1325	92.4	2.8	1325		Sun et al., 2018
Dangyangke	26.42	117.12	DY11-14C	2.3	1343	92.4	2.8	1343		Sun et al., 2018
Dangyangke	26.42	117.12	DY11-16	2.4	1325	95.7	2.9	1325		Sun et al., 2018
Dangyangke	26.42	117.12	SH11-01B	2.3	1344	92.4	2.8	1344		Sun et al., 2018
Jiucaidi	23.62	116.09	PY-JC-01II	1.8	1310	75.9	2.3	1310		Sun et al., 2018
Jiucaidi	23.62	116.09	PY-JC-01III	1.9	1297	79.2	2.4	1297		Sun et al., 2018
Jiucaidi	23.62	116.09	JC11-03A	2.2	1290	89.1	2.7	1290		Sun et al., 2018
Jiucaidi	23.62	116.09	PY-JC-06	1.8	1305	75.9	2.3	1305		Sun et al., 2018
Jiucaidi	23.62	116.09	JC11-25	1.8	1310	75.9	2.3	1310		Sun et al., 2018
Jiucaidi	23.62	116.09	JC11-27	1.8	1327	75.9	2.3	1327		Sun et al., 2018
Jiucaidi	23.62	116.09	JC11-29	1.8	1294	75.9	2.3	1294		Sun et al., 2018
Jiucaidi	23.62	116.09	PY-JC-04	1.8	1296	75.9	2.3	1296		Sun et al., 2018
Jiucaidi	23.62	116.09	PY-JC-01I	1.8	1319	75.9	2.3	1319		Sun et al., 2018
Xiadai	29.06	118.98	PY-XD-02	2.6	1390	102.3	3.1	1390		Sun et al., 2018
Xiadai	29.06	118.98	PY-XD-03	2.4	1352	95.7	2.9	1352		Sun et al., 2018
Xiadai	29.06	118.98	PY-XD-05	2.3	1356	92.4	2.8	1356		Sun et al., 2018
Xiadai	29.06	118.98	PY-XD-07I	2.6	1362	102.3	3.1	1362		Sun et al., 2018
Xiadai	29.06	118.98	PY-XD-11	2.5	1339	99	3	1339		Sun et al., 2018
Xiadai	29.06	118.98	XD11-11A	2.6	1238	102.3	3.1	1238		Sun et al., 2018
Xiadai	29.06	118.98	XD11-11C	2.7	1285	105.6	3.2	1285		Sun et al., 2018
Xiadai	29.06	118.98	XD11-11D	2.5	1364	99	3	1364		Sun et al., 2018
Xiadai	29.06	118.98	PY-XD-08 III	2.7	1349	105.6	3.2	1349		Sun et al., 2018
Xiadai	29.06	118.98	PY-XD-08IV	2.4	1370	95.7	2.9	1370		Sun et al., 2018
Hainan	19.8	110	08HN-2A	2.86	1518	94.38	2.86	1518	4	Wang et al., 2011
Hainan	19.8	110	08HN-2B	2.75	1516	90.75	2.75	1516	4	Wang et al., 2011
Hainan	19.8	110	08HN-22D	3.1	1529	102.3	3.1	1529	4	Wang et al., 2011
Hainan	19.8	110	08HN-24A	2.52	1488	83.16	2.52	1488	4	Wang et al., 2011
Hainan	19.8	110	08HN-24B	2.6	1498	85.8	2.6	1498	4	Wang et al., 2011
Hainan	19.8	110	HN9910	3.02	1502	99.66	3.02	1502	4	Zou et al., 2010
Hainan	19.8	110	HN9911	2.79	1476	92.07	2.79	1476	4	Zou et al., 2010
Hainan	19.8	110	HN9912	3.16	1507	104.28	3.16	1507	4	Zou et al., 2010
Hainan	19.8	110	HN9908	3.16	1509	104.28	3.16	1509	4	Zou et al., 2010
Hainan	19.8	110	HN9910	3.16	1526	104.28	3.16	1526	4	Fan et al., 2004
Hainan	19.8	110	QB014	2.9	1515	95.7	2.9	1515	4	Fan et al., 2004
Hainan	19.8	110	II2B-2	2.7	1502	89.1	2.7	1502	4	Fan et al., 2004

## Sheet: TABLE A3
Table A3. Equilibrium P-T of mantle xenoliths
Locality	Lat	Long (°E)	Sample	Equilibirum depth(km)	Equilibirum P(GPa)	Equilibirum T(°C)	Age(Ma)	References
East China										Reference:
Qilin	23.38	116.29	Q9307	38.61	1.17	904	35.5	Xu et al., 1996		Xu X, O'Reilly S Y, Zhou X, et al. A xenolith-derived geotherm and the crust-mantle boundary at Qilin, southeastern China[J]. Lithos, 1996, 38(1-2): 41-62.
Qilin	23.38	116.29	Q9323	38.61	1.17	904	35.5	Xu et al., 1996		Lin C Y, Huang X L, Xu Y G, et al. Thermal structure and rheology of upper mantle beneath Leizhou Peninsula, Guangdong Province[J]. China. J Trop Oceanogr, 2003, 22: 49-62.
Qilin	23.38	116.29	Q9324	38.61	1.17	904	35.5	Xu et al., 1996
Qilin	23.38	116.29	Q8907	44.55	1.35	957	35.5	Xu et al., 1996
Qilin	23.38	116.29	Q9352	40.26	1.22	941	35.5	Xu et al., 1996
Qilin	23.38	116.29	Q9353	33.33	1.01	935	35.5	Xu et al., 1996
Qilin	23.38	116.29	Q9355	39.6	1.2	914	35.5	Xu et al., 1996
Qilin	23.38	116.29	Q9327	39.27	1.19	939	35.5	Xu et al., 1996
Qilin	23.38	116.29	Q9351	45.87	1.39	941	35.5	Xu et al., 1996
Qilin	23.38	116.29	QL1	36.96	1.12	891	35.5	Xu et al., 1996
Qilin	23.38	116.29	QL8	33.33	1.01	860	35.5	Xu et al., 1996
Qilin	23.38	116.29	QL13	22.77	0.69	839	35.5	Xu et al., 1996
Qilin	23.38	116.29	QL21	30.69	0.93	847	35.5	Xu et al., 1996
Mingxi	26.37	117.24	DYK-1	72.27	2.19	1156	4.96-0.72	Lin et al., 1999
Mingxi	26.37	117.24	DYK-2	69.3	2.1	1100	4.96-0.72	Lin et al., 1999
Mingxi	26.37	117.24	DYK-3	73.92	2.24	1170	4.96-0.72	Lin et al., 1999
Mingxi	26.37	117.24	DYK-6	66	2	1108	4.96-0.72	Lin et al., 1999
Mingxi	26.37	117.24	DYK-7	70.62	2.14	1106	4.96-0.72	Lin et al., 1999
Mingxi	26.37	117.24	DYK-8	68.97	2.09	1091	4.96-0.72	Lin et al., 1999
Mingxi	26.37	117.24	DYK-16	75.9	2.3	1171	4.96-0.72	Lin et al., 1999
Mingxi	26.37	117.24	DYK-21	70.62	2.14	1144	4.96-0.72	Lin et al., 1999
Mingxi	26.37	117.24	DYK-23	65.01	1.97	1071	4.96-0.72	Lin et al., 1999
Mingxi	26.37	117.24	DYK-29	67.98	2.06	1097	4.96-0.72	Lin et al., 1999
Mingxi	26.37	117.24	DYK-30	64.35	1.95	1065	4.96-0.72	Lin et al., 1999
Mingxi	26.37	117.24	DYK-36	64.68	1.96	1061	4.96-0.72	Lin et al., 1999
Mingxi	26.37	117.24	DYK-41	72.27	2.19	1159	4.96-0.72	Lin et al., 1999
Mingxi	26.37	117.24	DYK-42	71.61	2.17	1126	4.96-0.72	Lin et al., 1999
Mingxi	26.37	117.24	DYK-43	72.6	2.2	1133	4.96-0.72	Lin et al., 1999
Mingxi	26.37	117.24	DYK-44	65.67	1.99	1087	4.96-0.72	Lin et al., 1999
Mingxi	26.37	117.24	DYK-45	72.93	2.21	1158	4.96-0.72	Lin et al., 1999
Mingxi	26.37	117.24	MX07-1	21.78	0.66	713	4.96-0.72	Unpublished data
Mingxi	26.37	117.24	MX09-2	21.12	0.64	663	4.96-0.72	Unpublished data
Mingxi	26.37	117.24	MX09-4	15.18	0.46	631	4.96-0.72	Unpublished data
Mingxi	26.37	117.24	MX09-6	20.79	0.63	715	4.96-0.72	Unpublished data
Leizhou Peninsula	20.62	110.06	XW-3NJ	39.93	1.21	915	6.1-0.18	Yu et al., 2003
Leizhou Peninsula	20.62	110.06	XW-3	50.49	1.53	994	6.1-0.18	Yu et al., 2003
Leizhou Peninsula	20.62	110.06	LZ-51	64.02	1.94	1072	6.1-0.18	Yu et al., 2003
Leizhou Peninsula	20.62	110.06	LZ-47-2	49.83	1.51	1007	6.1-0.18	Yu et al., 2003
Leizhou Peninsula	20.62	110.06	LZ-47-1	51.81	1.57	1017	6.1-0.18	Yu et al., 2003
Leizhou Peninsula	20.62	110.06	LZ-46	49.5	1.5	961	6.1-0.18	Yu et al., 2003
Leizhou Peninsula	20.62	110.06	LZ-44-IV	58.08	1.76	1031	6.1-0.18	Yu et al., 2003
Leizhou Peninsula	20.62	110.06	LZ-44-III	54.45	1.65	1023	6.1-0.18	Yu et al., 2003
Leizhou Peninsula	20.62	110.06	LZ-44-II	61.05	1.85	1028	6.1-0.18	Yu et al., 2003
Leizhou Peninsula	20.62	110.06	LZ-44-I	61.38	1.86	1035	6.1-0.18	Yu et al., 2003
Leizhou Peninsula	20.62	110.06	LZ-42	80.19	2.43	1109	6.1-0.18	Yu et al., 2003
Leizhou Peninsula	20.62	110.06	LZ-37	60.06	1.82	1034	6.1-0.18	Yu et al., 2003
Leizhou Peninsula	20.62	110.06	LZ-30	52.8	1.6	969	6.1-0.18	Yu et al., 2003
Leizhou Peninsula	20.62	110.06	LZ-34	62.37	1.89	1042	6.1-0.18	Yu et al., 2003
Leizhou Peninsula	20.62	110.06	LZ-15	47.85	1.45	963	6.1-0.18	Yu et al., 2003
Leizhou Peninsula	20.62	110.06	gyx-35	60.39	1.83	1017	6.1-0.18	Lin et al., 2003
Leizhou Peninsula	20.62	110.06	gyx-29	45.21	1.37	941	6.1-0.18	Lin et al., 2003
Leizhou Peninsula	20.62	110.06	gyx-29LB	40.59	1.23	901	6.1-0.18	Huang et al., 2007
Leizhou Peninsula	20.62	110.06	gyx-29LA	40.26	1.22	901	6.1-0.18	Huang et al., 2007
Leizhou Peninsula	20.62	110.06	gyx-29GA	39.27	1.19	897	6.1-0.18	Huang et al., 2007
Xinchang	29.5	120.9	ZN-20	77.22	2.34	1215	10.5-2.9	Fan and Hooper, 1989
Xinchang	29.5	120.9	ZN-12	69.96	2.12	1171	10.5-2.9	Fan and Hooper, 1989
Xinchang	29.5	120.9	ZN-8	78.21	2.37	1177	10.5-2.9	Fan and Hooper, 1989
Xinchang	29.5	120.9	XC-14	62.04	1.88	1153	10.5-2.9	Lin et al., 1995
Xinchang	29.5	120.9	XC-8	73.26	2.22	1190	10.5-2.9	Lin et al., 1995
Xinchang	29.5	120.9	XC-1	74.91	2.27	1189	10.5-2.9	Lin et al., 1995
Xilong	30.76	119.78	XL-1-1	32.67	0.99	786	26.4-23.3	Yu et al., 2003
Anyuan	25.22	114.71	S-10(2)	78.87	2.39	1182	44-37	Zheng et al., 2004
Xilong	30.76	119.78	XL-1-2	33.66	1.02	801	26.4-23.3	Yu et al., 2003
Nüshan	33	118.15	Nu9408-2	47.85	1.45	950	1.4	Xu et al., 1998
Nüshan	33	118.15	Nu9408-1	44.22	1.34	924	1.4	Xu et al., 1998
Nüshan	33	118.15	NSGP1	44.55	1.35	926	1.4	Xu et al., 1998
Nüshan	33	118.15	NS93-4V	67.98	2.06	1163	1.4	Xu et al., 1998
Nüshan	33	118.15	Nu9503	67.65	2.05	1172	1.4	Xu et al., 1998
Nüshan	33	118.15	Nu1993-2	65.67	1.99	1148	1.4	Xu et al., 1998
Nüshan	33	118.15	Nu1993	65.67	1.99	1154	1.4	Xu et al., 1998
Nüshan	33	118.15	NS9313	66.66	2.02	1165	1.4	Xu et al., 1998
Nüshan	33	118.15	Nu9621	59.07	1.79	1129	1.4	Xu et al., 1998
Nüshan	33	118.15	Nu9604	60.39	1.83	1127	1.4	Xu et al., 1998
Nüshan	33	118.15	NS9313-3	63.03	1.91	1167	1.4	Xu et al., 1998
Nüshan	33	118.15	NS9313-2	61.71	1.87	1153	1.4	Xu et al., 1998
Nüshan	33	118.15	Nu1989	64.02	1.94	1122	1.4	Xu et al., 1998
Nüshan	33	118.15	Nu9413	63.03	1.91	1147	1.4	Xu et al., 1998
Nüshan	33	118.15	Nu9301-2	61.71	1.87	1153	1.4	Xu et al., 1998
Nüshan	33	118.15	Nu9414	69.63	2.11	1116	1.4	Xu et al., 1998
Nüshan	33	118.15	Nu9410	72.27	2.19	1163	1.4	Xu et al., 1998
Nüshan	33	118.15	Nu9407	73.92	2.24	1159	1.4	Xu et al., 1998
Nüshan	33	118.15	Nu9506	63.36	1.92	1161	1.4	Xu et al., 1998
Nüshan	33	118.15	Nu9504	62.04	1.88	1154	1.4	Xu et al., 1998
Nüshan	33	118.15	Nu9502	64.35	1.95	1174	1.4	Xu et al., 1998
Nüshan	33	118.15	NS218	43.23	1.31	898	1.4	Unpublished data
Nüshan	33	118.15	N-3	63.03	1.91	1163	1.4	Jin and Pan, 1998
Nüshan	33	118.15	NS201	27.06	0.82	793	1.4	Huang et al., 2004
Nüshan	33	118.15	NS202c	26.07	0.79	765	1.4	Huang et al., 2004
Nüshan	33	118.15	NS202r	27.06	0.82	790	1.4	Huang et al., 2004
Nüshan	33	118.15	NS203	20.13	0.61	749	1.4	Huang et al., 2004
Nüshan	33	118.15	NS204	24.42	0.74	719	1.4	Huang et al., 2004
Nüshan	33	118.15	NS205	22.77	0.69	786	1.4	Huang et al., 2004
Nüshan	33	118.15	NS206	28.05	0.85	792	1.4	Huang et al., 2004
Nüshan	33	118.15	NS207	22.44	0.68	745	1.4	Huang et al., 2004
Nüshan	33	118.15	NS210	17.16	0.52	656	1.4	Huang et al., 2004
Nüshan	33	118.15	NS212	22.77	0.69	731	1.4	Huang et al., 2004
Nüshan	33	118.15	NS213	19.47	0.59	758	1.4	Huang et al., 2004
Nüshan	33	118.15	NS214	12.87	0.39	672	1.4	Huang et al., 2004
Nüshan	33	118.15	Nu8901	13.86	0.42	708	1.4	Xu et al., 1998
Nüshan	33	118.15	Nu8902	22.11	0.67	778	1.4	Xu et al., 1998
Nüshan	33	118.15	Nu8903	11.22	0.34	699	1.4	Xu et al., 1998
Nüshan	33	118.15	Nu9518	21.12	0.64	716	1.4	Xu et al., 1998
Nüshan	33	118.15	Nu9521	20.79	0.63	730	1.4	Xu et al., 1998
Nüshan	33	118.15	Nu9523	18.15	0.55	744	1.4	Xu et al., 1998
Kuandian	40.74	124.77	96Kd15	56.1	1.7	1059	0.27-0.12	Fang and Ma, 1999
Kuandian	40.74	124.77	96Kd12	57.42	1.74	1009	0.27-0.12	Fang and Ma, 1999
Kuandian	40.74	124.77	96Kd11	55.77	1.69	1042	0.27-0.12	Fang and Ma, 1999
Kuandian	40.74	124.77	96Kd03	61.38	1.86	1027	0.27-0.12	Fang and Ma, 1999
Kuandian	40.74	124.77	95Kd24	53.46	1.62	1044	0.27-0.12	Fang and Ma, 1999
Kuandian	40.74	124.77	95Kd11	51.48	1.56	1031	0.27-0.12	Fang and Ma, 1999
Kuandian	40.74	124.77	96Kd17	58.74	1.78	1074	0.27-0.12	Fang and Ma, 1999
Kuandian	40.74	124.77	95Kd03	55.77	1.69	1070	0.27-0.12	Fang and Ma, 1999
Shanwang	36.5	118.54	SW04-6	65.01	1.97	1174	14-13	Zheng et al., 2006
Shanwang	36.5	118.54	SW04-2	53.79	1.63	1090	14-13	Zheng et al., 2006
Shanwang	36.5	118.54	SW01-8	79.86	2.42	1182	14-13	Zheng et al., 2006
Shanwang	36.5	118.54	SW01-1	75.24	2.28	1164	14-13	Zheng et al., 2006
Shanwang	36.5	118.54	SW0193	56.76	1.72	1007	14-13	Zheng et al., 2006
Shanwang	36.5	118.54	SW0169	65.67	1.99	1100	14-13	Zheng et al., 2006
Jiaohe	43.73	127.35	YQSX-13	54.45	1.65	1006	24-2	Yu, 2008
Jiaohe	43.73	127.35	YQS-19	33.66	1.02	825	24-2	Yu, 2008
Jiaohe	43.73	127.35	YQS-18	45.87	1.39	904	24-2	Yu, 2008
Jiaohe	43.73	127.35	YQSX-4	51.48	1.56	948	24-2	Yu, 2008
Jiaohe	43.73	127.35	YQSX-12	44.22	1.34	901	24-2	Yu, 2008
Jiaohe	43.73	127.35	YQSX-7	53.13	1.61	1024	24-2	Yu, 2008
Jiaohe	43.73	127.35	YQSX-2	57.75	1.75	1030	24-2	Yu, 2008
Jiaohe	43.73	127.35	BSK-12	54.78	1.66	989	24-2	Yu, 2008
Jiaohe	43.73	127.35	BSK-13	54.45	1.65	1001	24-2	Yu, 2008
Chao’erhe	47.86	121.32	07WNP11	95.37	2.89	1311	2.58-0	Fan et al., 2008
Chao’erhe	47.86	121.32	07WNP09	85.8	2.6	1326	2.58-0	Fan et al., 2008
Chao’erhe	47.86	121.32	07WNP07	91.08	2.76	1227	2.58-0	Fan et al., 2008
Chao’erhe	47.86	121.32	07WNP06	76.56	2.32	1155	2.58-0	Fan et al., 2008
Chao’erhe	47.86	121.32	07WNP05	99.99	3.03	1337	2.58-0	Fan et al., 2008
Chao’erhe	47.86	121.32	07WNP04	80.19	2.43	1143	2.58-0	Fan et al., 2008
Chao’erhe	47.86	121.32	07WNP02	91.08	2.76	1192	2.58-0	Fan et al., 2008
Chao’erhe	47.86	121.32	07DHL02	88.11	2.67	1198	2.58-0	Fan et al., 2008
Chao’erhe	47.86	121.32	07DHL01	76.23	2.31	1121	2.58-0	Fan et al., 2008
Chao’erhe	47.86	121.32	Chaoerhe1	90.75	2.75	1192	2.58-0	Fan et al., 2008
Hannuoba	41.18	114.71	90DA11	75.9	2.3	1114	25-14	Chen et al., 2001
Hannuoba	41.18	114.71	JSB	62.7	1.9	1065	25-14	Chen et al., 2001
Hannuoba	41.18	114.71	95SQ9	62.04	1.88	1062	25-14	Chen et al., 2001
Hannuoba	41.18	114.71	95JSB4	66	2	1090	25-14	Chen et al., 2001
Hannuoba	41.18	114.71	30J27	65.34	1.98	1089	25-14	Chen et al., 2001
Hannuoba	41.18	114.71	TGZ	63.03	1.91	1098	25-14	Chen et al., 2001
Hannuoba	41.18	114.71	T253	67.32	2.04	1127	25-14	Chen et al., 2001
Hannuoba	41.18	114.71	NT26	78.87	2.39	1216	25-14	Chen et al., 2001
Hannuoba	41.18	114.71	30J26	66.33	2.01	1088	25-14	Chen et al., 2001
Hannuoba	41.18	114.71	2XM2	65.01	1.97	1082	25-14	Chen et al., 2001
Hannuoba	41.18	114.71	Dmp-9	25.707	0.779	783	25-14	Chen et al., 2001
Hannuoba	41.18	114.71	Dmp-7	29.931	0.907	771	25-14	Chen et al., 2001
Hannuoba	41.18	114.71	Dmp-4	25.41	0.77	798	25-14	Chen et al., 2001
Hannuoba	41.18	114.71	DM3	29.04	0.88	805	25-14	Chen et al., 2001
Hannuoba	41.18	114.71	95SQ1	34.32	1.04	832	25-14	Chen et al., 2001
Hannuoba	41.18	114.71	95DA15	31.02	0.94	834	25-14	Chen et al., 2001
Hannuoba	41.18	114.71	93DA8	30.69	0.93	816	25-14	Chen et al., 2001
Hannuoba	41.18	114.71	90DA9	31.35	0.95	775	25-14	Chen et al., 2001
Hannuoba	41.18	114.71	90DA4	31.02	0.94	828	25-14	Chen et al., 2001
Hannuoba	41.18	114.71	D39	31.02	0.94	794	25-14	Unpublished data
Hannuoba	41.18	114.71	D36	23.76	0.72	609	25-14	Unpublished data
Hannuoba	41.18	114.71	D34	31.35	0.95	729	25-14	Unpublished data
Hannuoba	41.18	114.71	D22	26.4	0.8	739	25-14	Unpublished data
Hebi	35.75	114.29	Hebi-1	62.37	1.89	1167	4.3-4	Fan et al., 2008
